# Supplementary material for: Directed self-assembly strategy of a DET complex based on the application of artificial electron channeling
Source: Royal Society of Chemistry journal article supplement (doi:10.1039/d3cy00302g), 2023-01-01
Supplement: d3cy00302g1.pdf [file d3cy00302g1.pdf]

## Supporting information

### Directed self-assembly strategy of DET complex based on the application of artificial electron channeling

Zhan Song<sup>1</sup>, Meijing Wei<sup>1</sup>, Yinghao Fang<sup>1</sup>, Fuping Lu<sup>1</sup>, Minze Jia<sup>b</sup>, Hui-Min Qin<sup>1,\*</sup>, and  
Shuhong Mao<sup>1,\*</sup>

<sup>1</sup>Key Laboratory of Industrial Fermentation Microbiology of the Ministry of Education;  
Tianjin Key Laboratory of Industrial Microbiology; College of Biotechnology, Tianjin  
University of Science and Technology; National Engineering Laboratory for Industrial  
Enzymes; Tianjin 300457, P. R. China

\*Corresponding authors: College of Biotechnology, Tianjin University of Science and  
Technology,

H.-M. Qin: huiminqin@tust.edu.cn;

S. Mao: shuhongmao@tust.edu.cn.

Tel: +86-22-60602949. Fax: +86-22-60602298

## **Contents**

**Table S1.** Bacterial strains and plasmids used in this study

**Table S2.** Primers used in this study.

**Table S3.** Characteristics of the resins used in this study.

**Figure S1.** The direct electron transfer (DET) pathways in multienzyme complex.

**Figure S2.** The interface interactions in multienzyme complex.

**Figure S3.** The results of iterative saturation mutagenesis (ISM).

**Figure S4.** Optimization of immobilization conditions.

**Figure S5.** Optimization of scaffold-protein-modified self-assembly directed immobilization.

**Figure S6.** Optimization substrate concentrations of scaffold-protein-modified self-assembly directed immobilization.

**Figure S7.** Modification of rate-limiting residues in the substrate channel leading into the binding pocket.

**Figure S8.** The thermostability of WT complex and mutant complex.

**Table S1** Bacterial strains and plasmids used in this study

| Strains and plasmids      | Description                                                                       | Source     |
|---------------------------|-----------------------------------------------------------------------------------|------------|
| <b>Strains</b>            |                                                                                   |            |
| <i>E. coli</i> JM109      | cloning                                                                           | Lab stock  |
| <i>E. coli</i> BL21 (DE3) | expression                                                                        | Lab stock  |
| KshA-BL21                 | pET28a carries <i>KshA</i> ; BL21 (DE3)                                           | Lab stock  |
| PRF-BL21                  | pET28a carries reductase domain and ferredoxin of CYP116B46; BL21 (DE3)           | Lab stock  |
| DmFdx2-BL21               | pET28a carries <i>DmFdx2</i> gene; BL21 (DE3)                                     | Lab stock  |
| FDH- BL21                 | pET28a carries <i>FDH</i> gene; BL21 (DE3)                                        | Lab stock  |
| <b>Plasmids</b>           |                                                                                   |            |
| pET28a-KshA               | pET28a, contain <i>KshA</i> gene (codon-optimized), KanR                          | Lab stock  |
| pET28a-PRF                | pET28a, contain <i>PRF</i> gene (codon-optimized), KanR                           | Lab stock  |
| pET28a-DmFdx2             | pET28a, contain <i>DmFdx2</i> gene (codon-optimized), KanR                        | Lab stock  |
| pET28a- FDH               | pET28a, contain <i>FDH</i> gene (codon-optimized), KanR                           | Lab stock  |
| Mutant MT1                | pET28a, contain Y110R in <i>KshA</i> gene, KanR                                   | This study |
| Mutant MT2                | pET28a, contain Y110R in <i>KshA</i> gene, T85D in <i>DmFdx2</i> gene, KanR       | This study |
| Mutant MT3                | pET28a, contain Y110R/Y226M in <i>KshA</i> gene, T85D in <i>DmFdx2</i> gene, KanR | This study |

**Table S2.** Primers used in this study.

| Mutations                          | Primmer      | Template                 | Sequence (5' to 3')                           |                        |
|------------------------------------|--------------|--------------------------|-----------------------------------------------|------------------------|
| <b>Alanine scanning</b>            |              |                          |                                               |                        |
| V259A                              | V259A-F      | PRF                      | CAAGCGGTGCTGAGAAACAGTGGC                      |                        |
|                                    | V259A-R      |                          | AAATGGTCTTTCTTTGGCAGGATCCAGATG                |                        |
| Q260A                              | Q260A-F      |                          | TTTGCAGTGGTGGCTGAGAAACAGTGG                   |                        |
|                                    | Q260A-R      |                          | ATCTCTATTCTCAGGATCACTACACAGGCT<br>ATACTGTCTGC |                        |
| S261A                              | S261A-F      |                          | AACGCTGGCCTGACTGTGGAAGTG                      |                        |
|                                    | S261A-R      |                          | TCTCAGCACCCTTCAAATGGTCTTTCTTTG                |                        |
| E264A                              | E264A-F      |                          | GTGGCAGTGCCTGCAGATAAAACCC                     |                        |
|                                    | E264A-R      |                          | GTCAGGCCACTGTTTCTCAGCACCAC                    |                        |
| W97A                               | W97A-F       |                          | KshA                                          | GATGCGCGTTGGGGTGGTAATG |
|                                    | W97A-R       |                          |                                               | GTGGAATGGG CACGCGATGC  |
| P109A                              | P109A-F      | ATCGCGTATGCCCGTCGTGTTC   |                                               |                        |
|                                    | P109A-R      | CGCGGTGCACTTGCCATTACC    |                                               |                        |
| Y110A                              | Y110A-F      | CCGGCTGCCCGTCGTGTTC      |                                               |                        |
|                                    | Y110A-R      | GATCGCGGTGCACTTGCCATTACC |                                               |                        |
| R112A                              | R112A-F      | CGTGCTGTTCCACCGCTGGC     |                                               |                        |
|                                    | R112A-R      | GGCATAACGGGATCGCGGTGC    |                                               |                        |
| T85A                               | T85A-F       | DmFdx2                   |                                               | CTGGCCTGCAGCACCTGCC    |
|                                    | T85A-R       |                          |                                               | AGTGCCTTCGCAGGCACCAAAG |
| T88A                               | T88A-F       |                          | AGCGCCTGCCACCTGATTTTTAAAAC                    |                        |
|                                    | T88A-R       |                          | GCAGGTCAAGTGCCTTCGCAG                         |                        |
| <b>Site-saturation mutagenesis</b> |              |                          |                                               |                        |
| Y110                               | Y110-F       |                          | KshA                                          | CCGNNNGCCCGTCGTGTTC    |
|                                    | Y110-R       | CCGNNKGCCCGTCGTGTTCCAC   |                                               |                        |
| Y110R/W97                          | Y110R/W97-F  | MT1                      | GATNNKCGTTGGGGTGGTAATGGC                      |                        |
|                                    | Y110R/W97-R  |                          | GTGGAATGGGCACGCGATGC                          |                        |
| Y110R/Y226                         | Y110R/Y226-F | MT1                      | AATNNKGGTGATCCGAATGCGGTGC                     |                        |
|                                    | Y110R/Y226-R |                          | CGTGCCACTGATGATATCTTCACGGC                    |                        |
| T85                                | T85-F        | PRF                      | CTGNNKTGCAGCACCTGCCACC                        |                        |
|                                    | T85-R        |                          | AGTGCCTTCGCAGGCACCAAAG                        |                        |

**Table S3.** Characteristics of the resins used in this study.

| Name   | Chemical composition    | Pore size<br>( $\mu\text{m}$ ) | Surface area<br>( $\text{m}^2/\text{g}$ ) | Swelling in<br>water |
|--------|-------------------------|--------------------------------|-------------------------------------------|----------------------|
| ES103B | Epoxy-polyacrylic ester | 300-450                        | 100-140                                   | no                   |
| ES108  | Epoxy-polyacrylic ester | 300-450                        | 100-140                                   | no                   |
| ESQ3   | Epoxy-polyacrylic ester | 300-450                        | 100-140                                   | no                   |
| ER3    | Epoxy-polyacrylic ester | 300-450                        | 80-120                                    | no                   |
| ER8    | Epoxy-polyacrylic ester | 300-450                        | 80-120                                    | no                   |

**Figure S1**

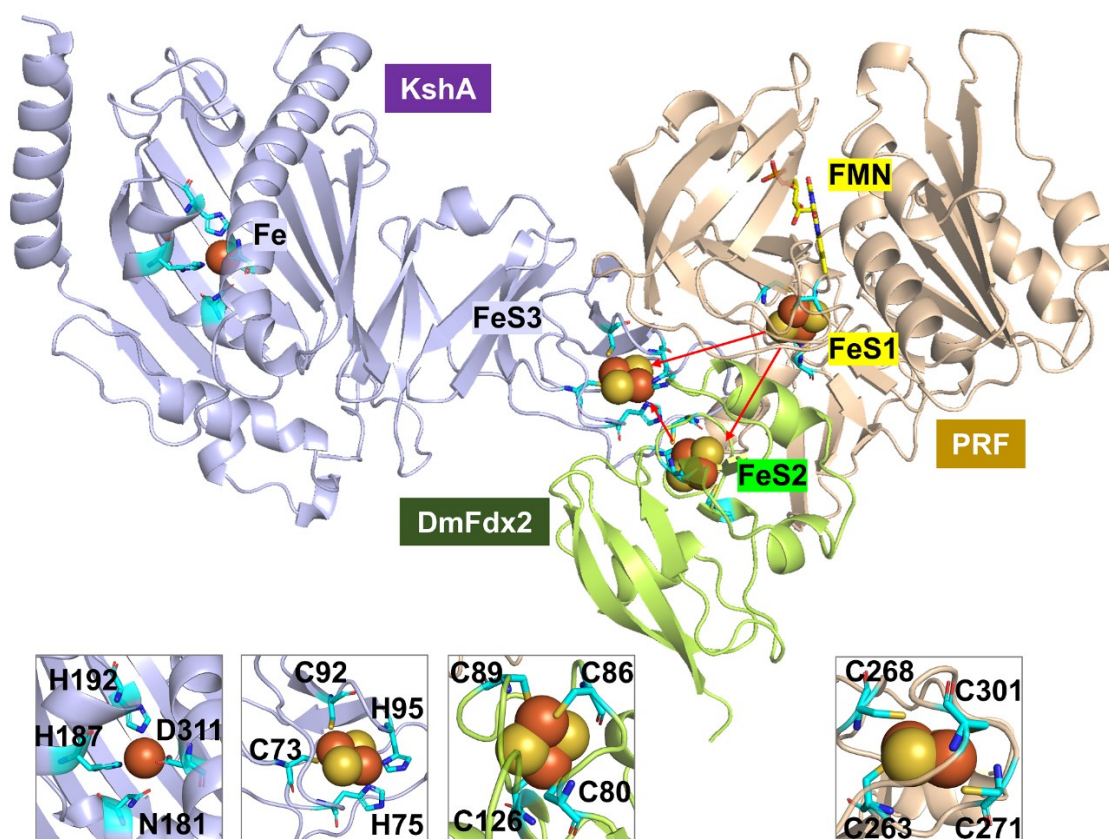

**Figure S1.** The direct electron transfer (DET) pathways in multienzyme complex. The overall structures of reductase PRF (golden), free ferredoxin DmFdx2 (green) and oxygenase KshA (purple) are shown as cartoon. FMN are shown as sticks. The coordination amino acids of Fe atoms and [2Fe-2S] clusters are shown as sticks.

Figure S2

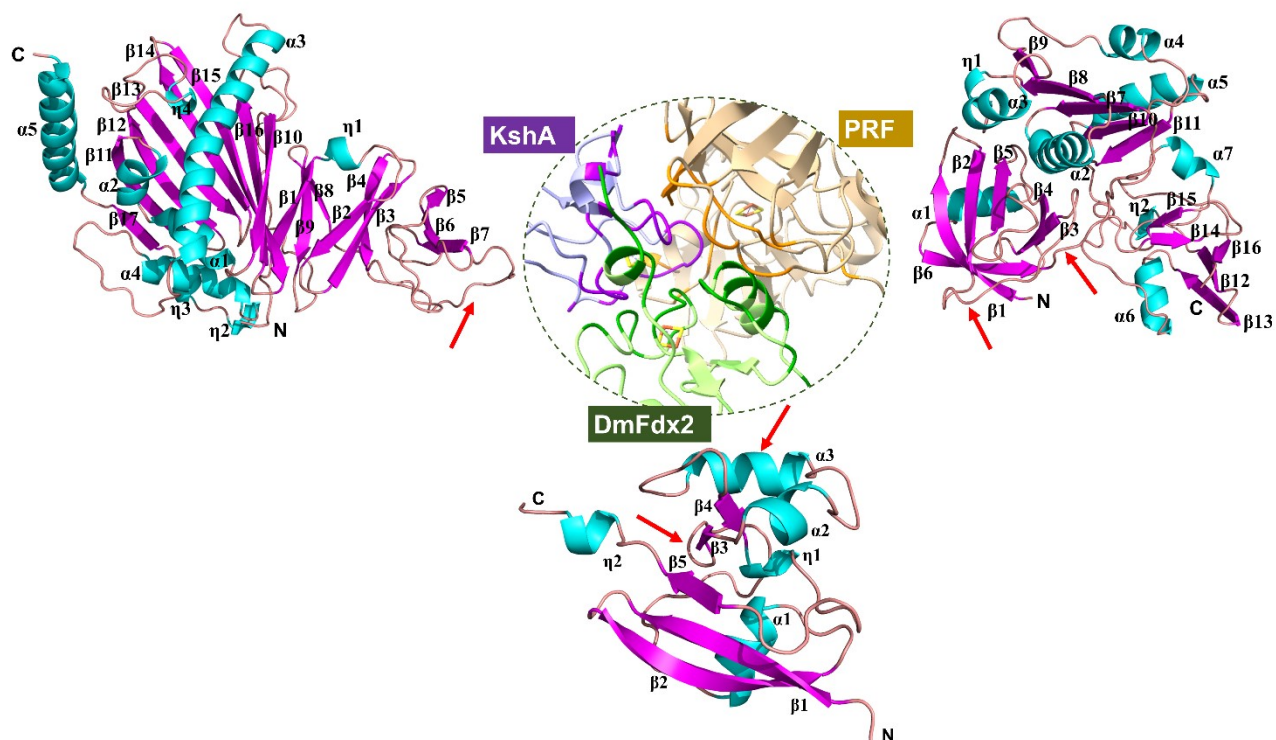

**Figure S2. The interface interactions in multienzyme complex.** The structures involved in interface interactions are marked by red arrows. The  $\alpha$ -helices (cyan) and  $\beta$ -strands (salmon) in structures of reductase PRF, free ferredoxin DmFdx2 and oxygenase KshA are labeled.

Figure S3

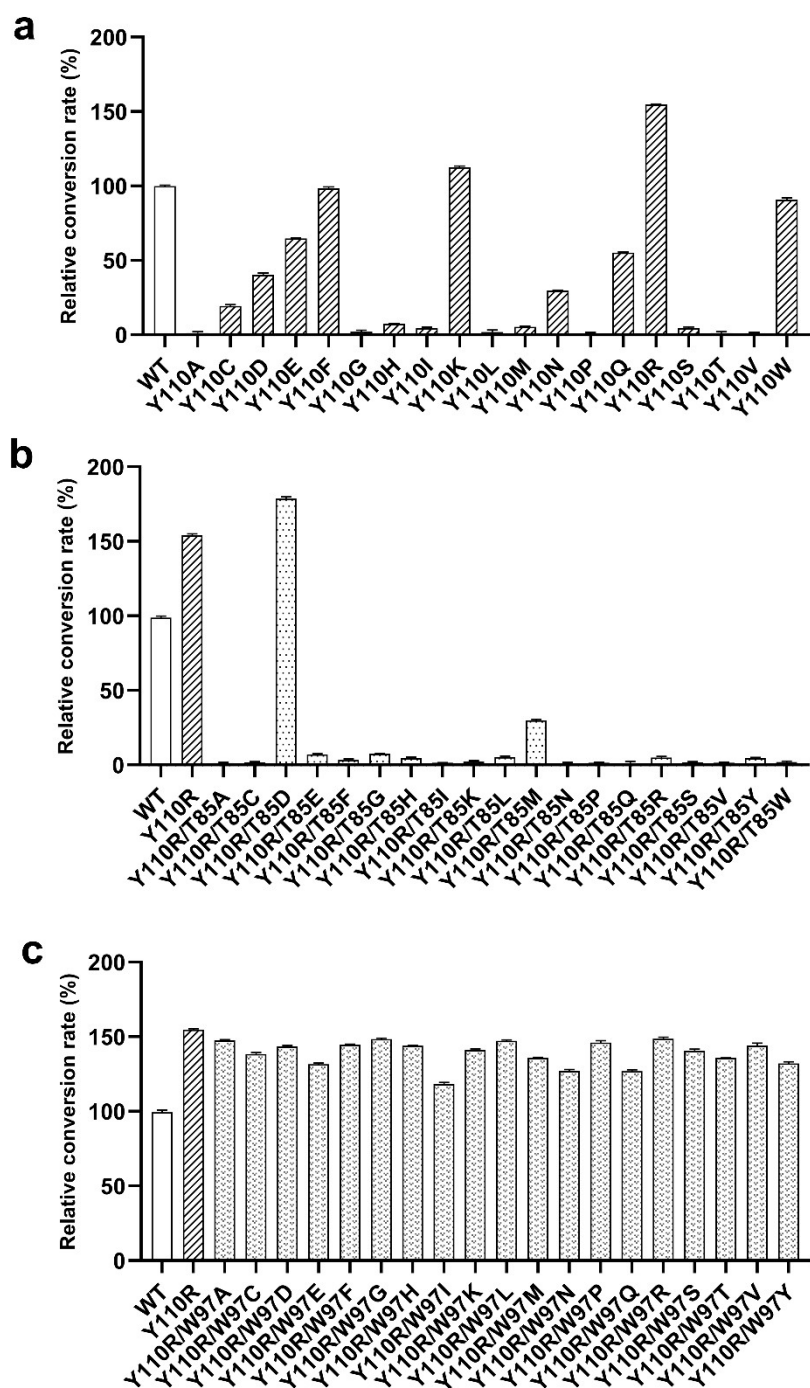

**Figure S3. The results of iterative saturation mutagenesis (ISM).** (a) The relative conversion rate of Y110 mutants in KshA with WT PRF+DmFdx2. (b) The relative conversion rate of T85 mutants in DmFdx2 with MT1 (Y110R in KshA) + WT PRF. (c) The relative conversion rate of W97 mutants in MT1 with WT PRF+DmFdx2.



**Figure S4**

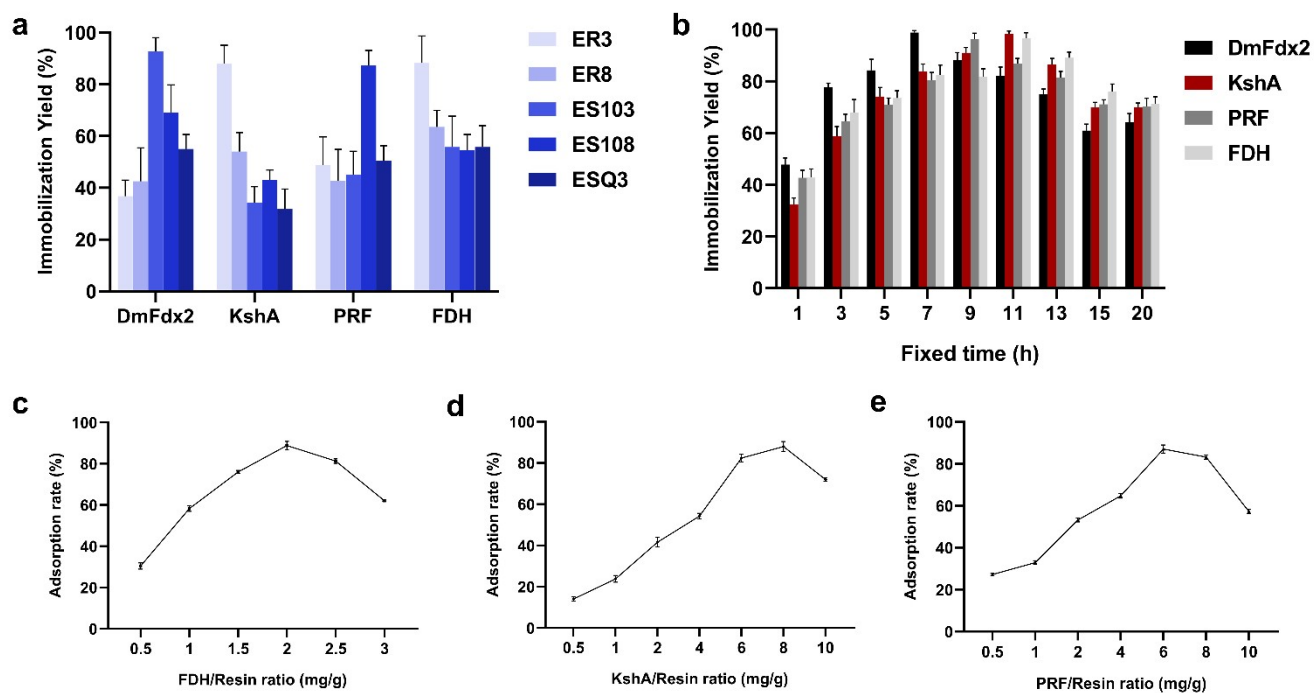

**Figure S4. Optimization of immobilization conditions.** (a) Optimization of immobilized epoxy resin. (b) Optimization of fixed time on epoxy resin. Optimized immobilization ratio of FDH and epoxy resin (c), KshA and epoxy resin (d), PRF and epoxy resin (e).

**Figure S5**

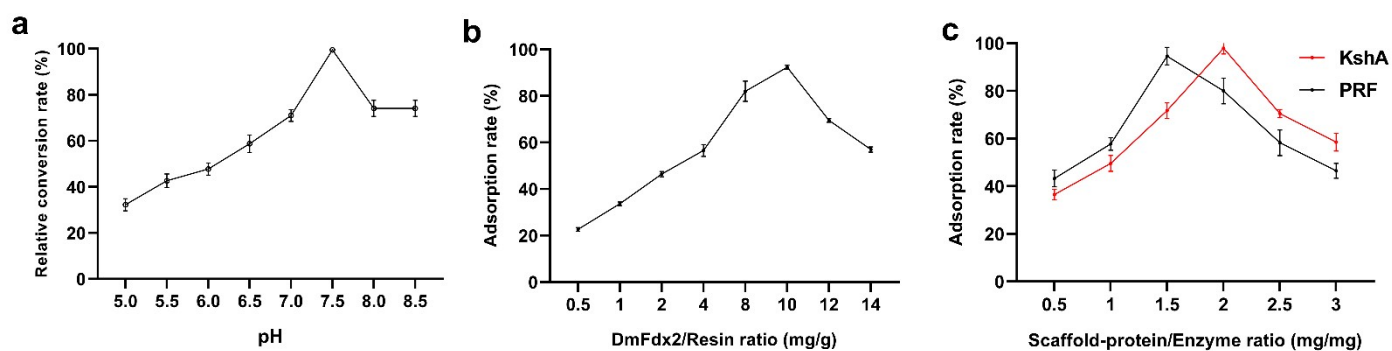

**Figure S5. Optimization of scaffold-protein-modified self-assembly directed immobilization.** (a) Optimized immobilization pH of ferredoxin DmFdx2. (b) Optimized immobilization ratio of DmFdx2 and epoxy resin. (c) Optimized immobilization ratio of scaffold-protein-modified epoxy resin and KshA, scaffold-protein-modified epoxy resin and PRF.

**Figure S6**

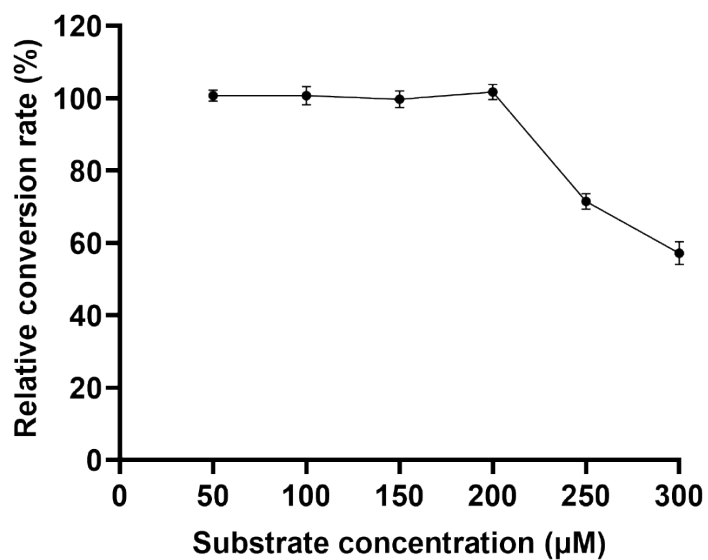

**Figure S6. Optimization substrate concentrations of scaffold-protein-modified self-assembly directed immobilization.** The immobilized multienzyme catalysis was performed and mixed with 50 mM phosphate buffer (pH 7.5), 500 μM NAD<sup>+</sup>, 1.75 mM sodium formate and immobilized proteins (self-assembly immobilized complex at the optimized ratio: 1 mg/mL reductase, 1.5 mg/mL Fdx, 0.75 mg/mL KshA), 0.25 mg/mL immobilized FDH with varying concentrations of AD dissolved in 2% methanol.

**Figure S7**

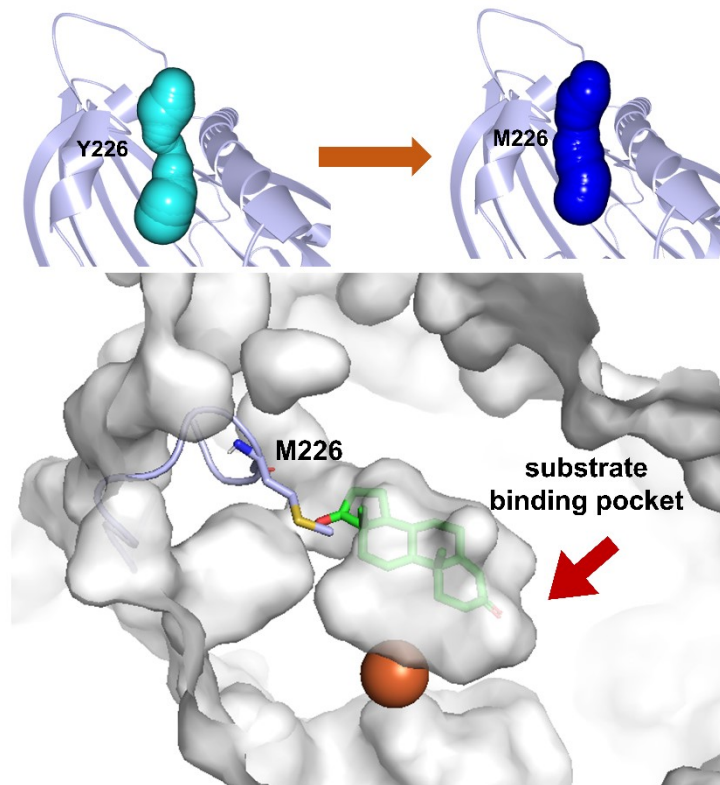

**Figure S7 Modification of rate-limiting residues in the substrate channel leading into the binding pocket.** Simulation of the substrate channel leading into the binding pocket by CAVER analyst v3.0.363, shown in cyan (WT Y226 in KshA) and blue (mutant M226 in KshA). Oxygenase KshA (gray) is shown as surface. Key residues and the substrate AD (green) are shown as sticks.

Figure S8

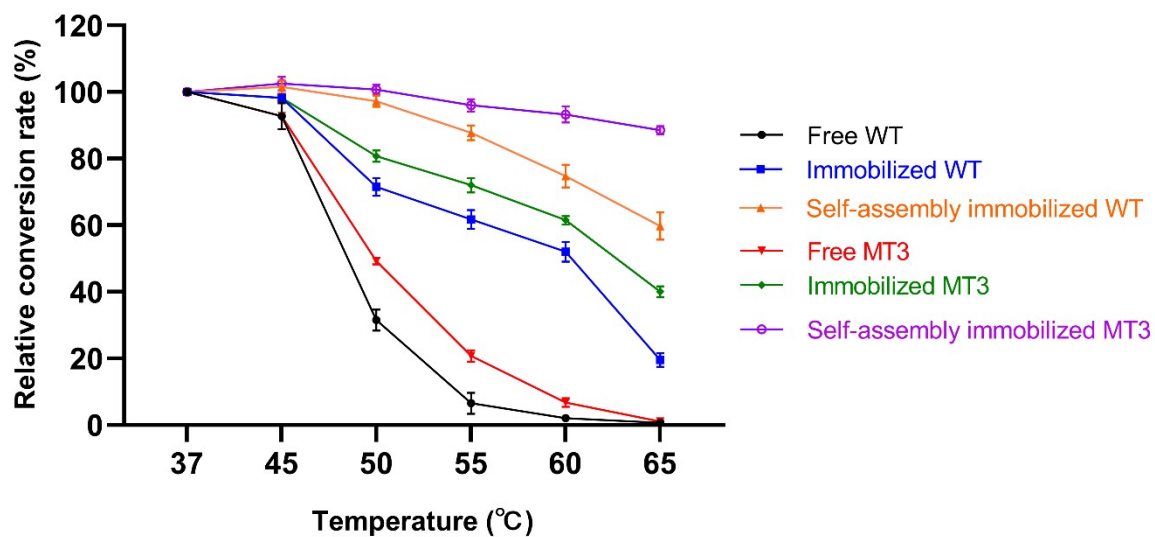

**Figure S8. The thermostability of WT complex and mutant complex.** The thermostability of free WT complex and MT3(Y110R/Y226M in KshA, T85D in DmFdx2) complex, separately immobilized multienzyme WT complex and MT3 complex, scaffold-protein-modified self-assembly immobilized WT complex and MT3 complex at 37-65 °C are shown.
